Development 138, 3591 (2011) doi:10.1242/dev.072058  
© 2011. Published by The Company of Biologists Ltd

## ***RABBIT EARS*, encoding a SUPERMAN-like zinc finger protein, regulates petal development in *Arabidopsis thaliana***

**Seiji Takeda, Noritaka Matsumoto and Kiyotaka Okada**

There was an error published in *Development* **131**, 425-434.

On page 428, the description of the *rbe-1* mutation and its position as depicted in Fig. 2B were incorrect. The correct description is as follows. In *rbe-1*, a C to T transversion at nucleotide position 241 in the cDNA sequence results in the replacement of an arginine with a stop codon at amino acid 81 in the RBE protein.

The authors apologise to readers for this mistake.
